# Supplementary material for: N-Alkylation/aldol reaction of α-aldimino thioesters: a facile three-component coupling reaction
Source: PubMed Central journal article supplement — RSC Adv. 2021 Apr 7;11(22):13097–104. doi: 10.1039/d1ra02000e (PMC8697212; doi:10.1039/d1ra02000e), 2021-04-07

## Supporting Information

### **2 *N*-Alkylation / aldol reaction of $\alpha$ -aldimino thioesters: A facile three-component coupling reaction**

**Makoto Shimizu,<sup>[a,b]\*</sup> Asako Higashino,<sup>[b]</sup> Isao Mizota,<sup>[b]</sup> and Yusong Zhu<sup>[a]</sup>**

*<sup>[a]</sup>School of Energy Science and Engineering College, Nanjing Tech University,  
Nanjing 211816, Jiangsu Province, China*

*<sup>[b]</sup>Department of Chemistry for Materials, Graduate School of Engineering, Mie  
University, Tsu, Mie 514-8507, Japan*

**Copies of  $^1\text{H}$  NMR and  $^{13}\text{C}$  NMR spectra**

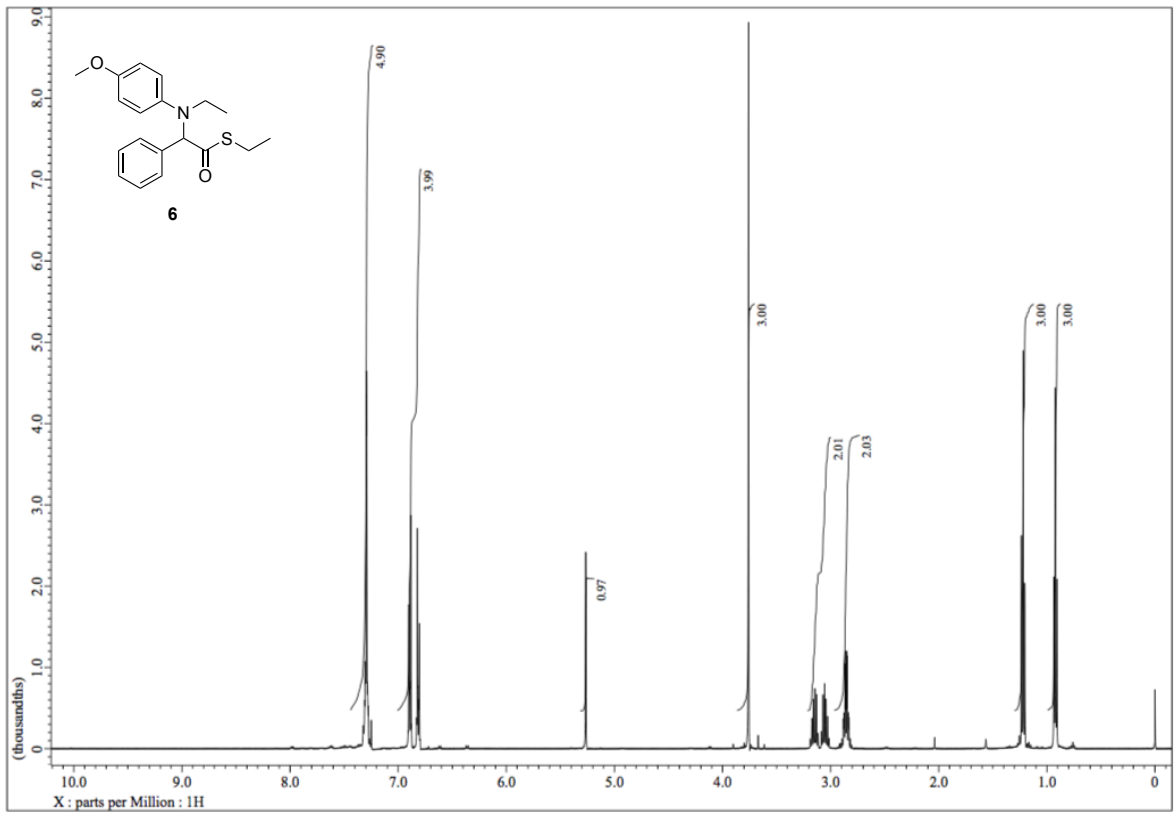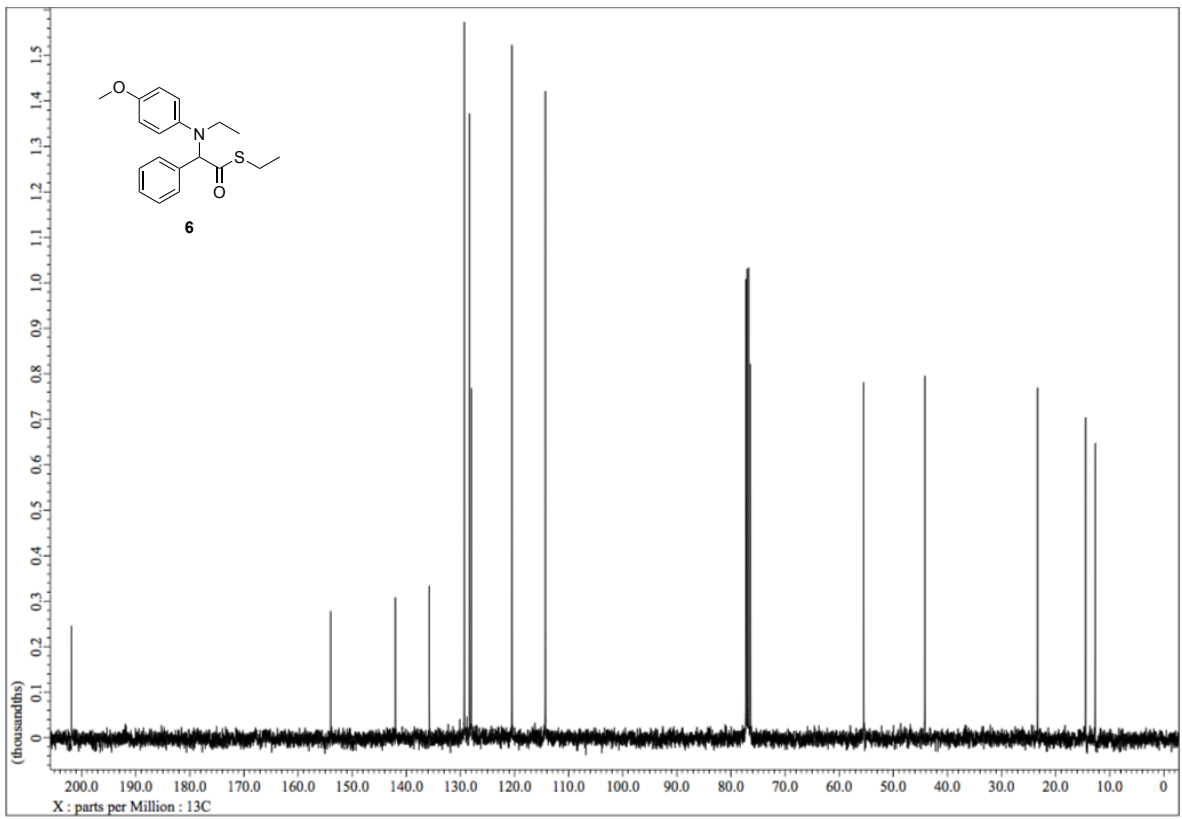

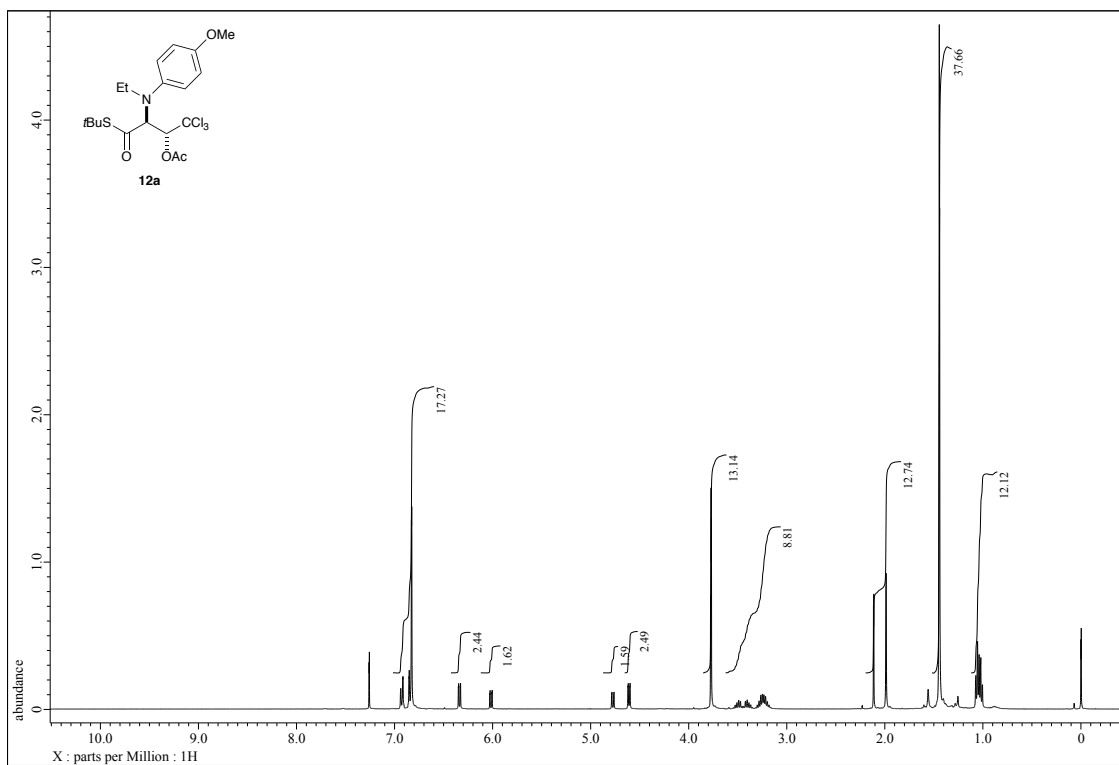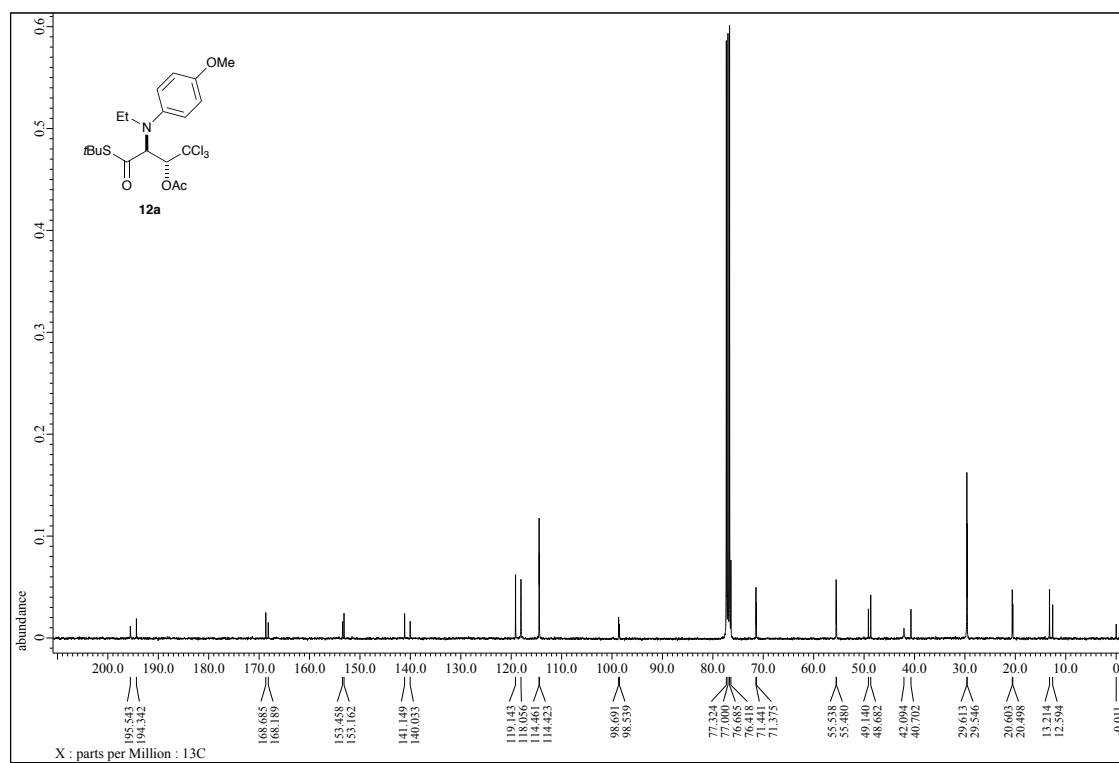



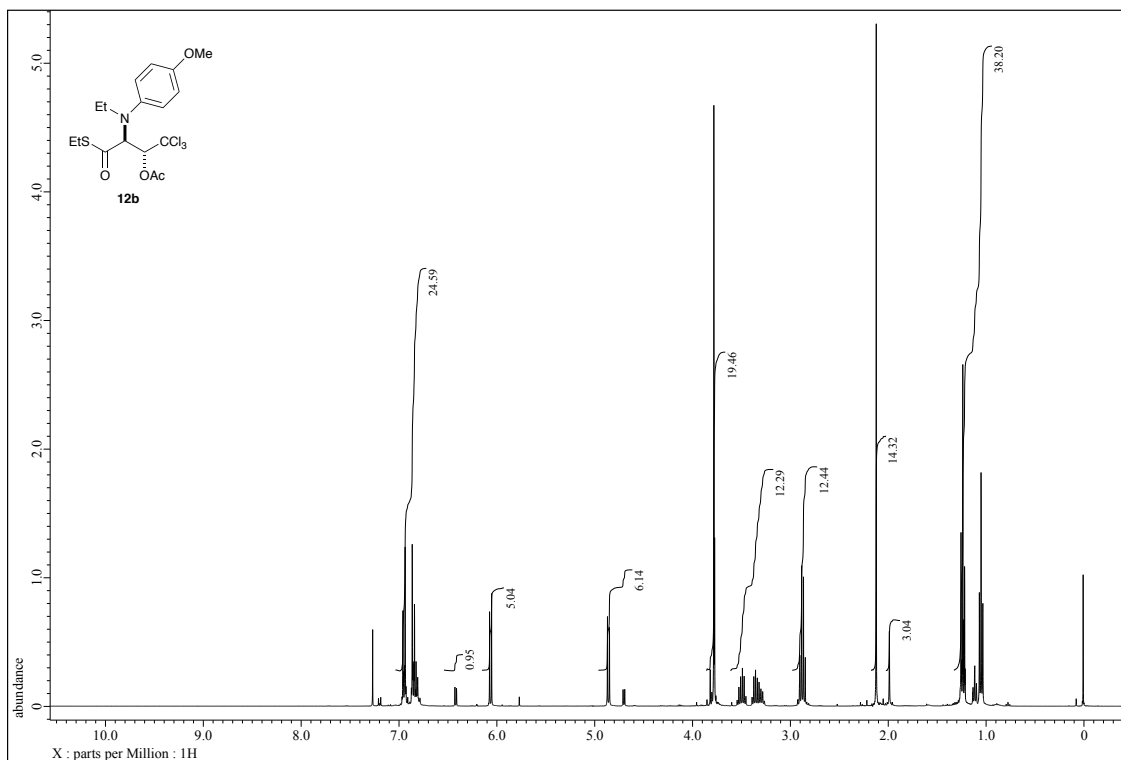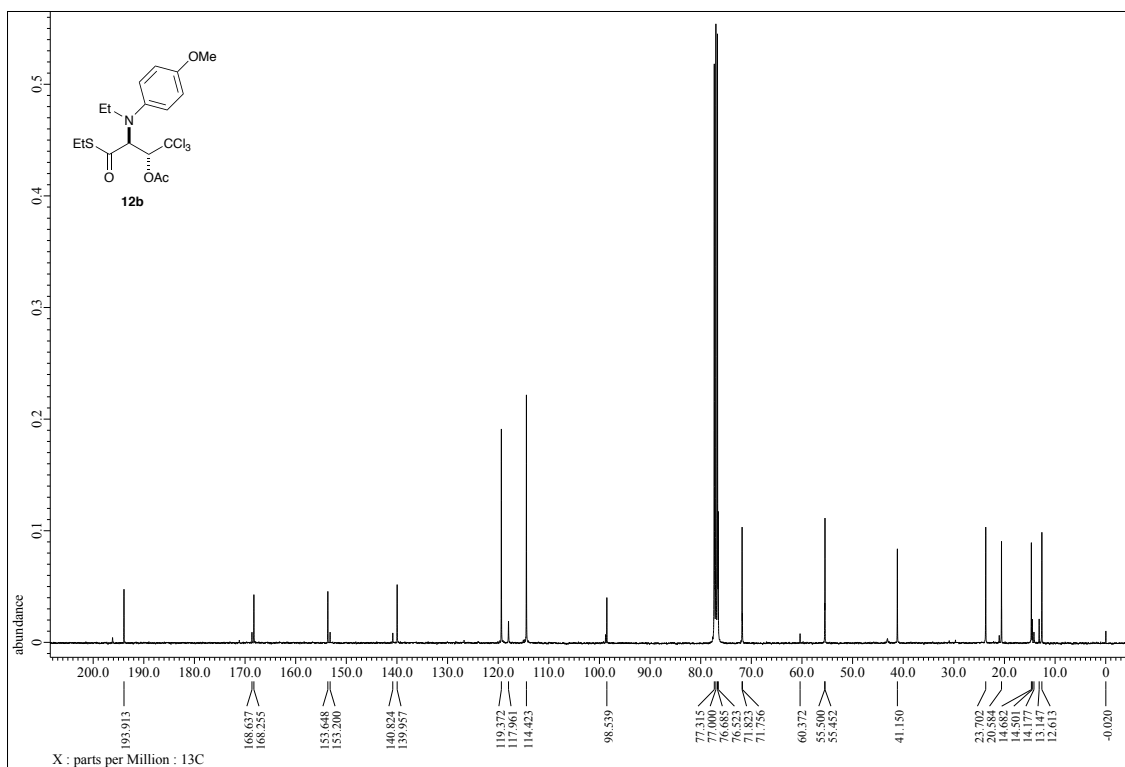

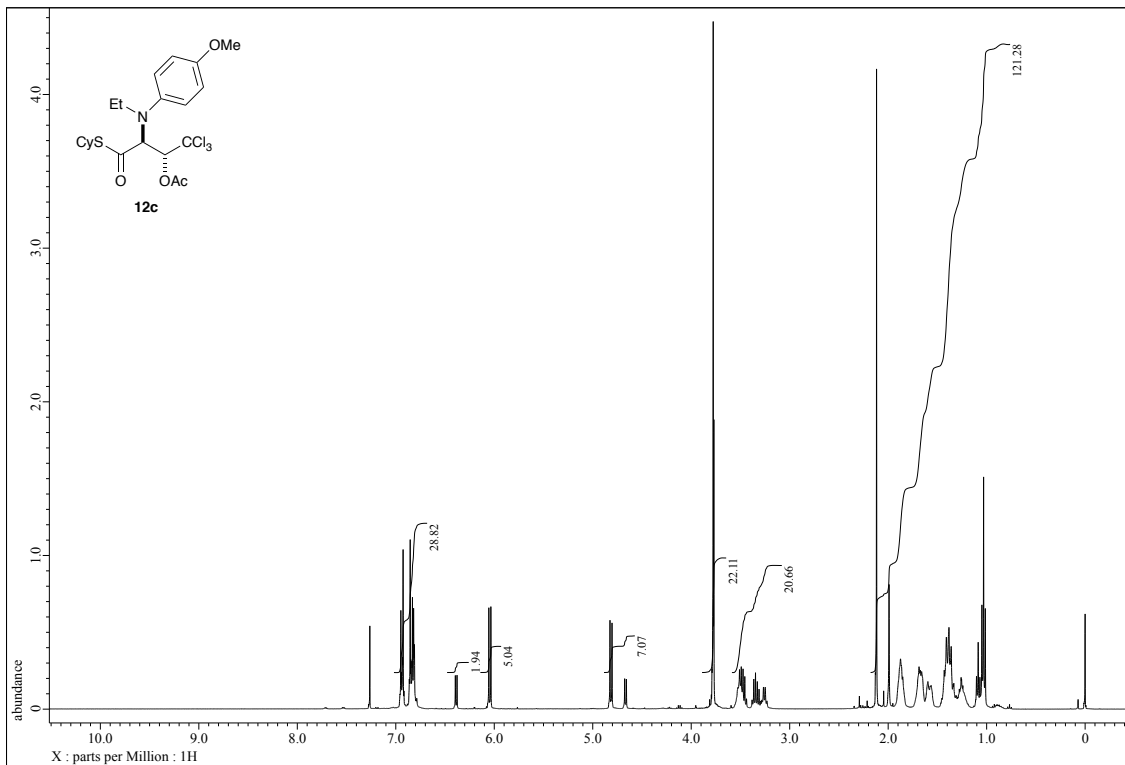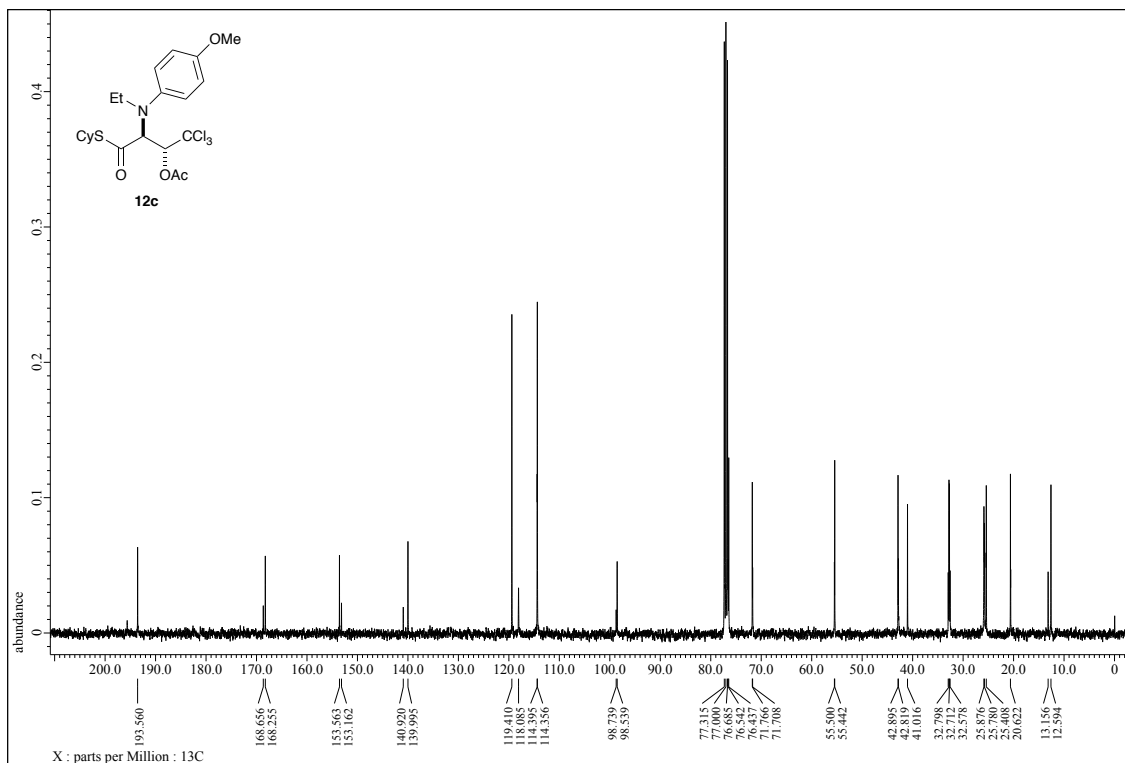

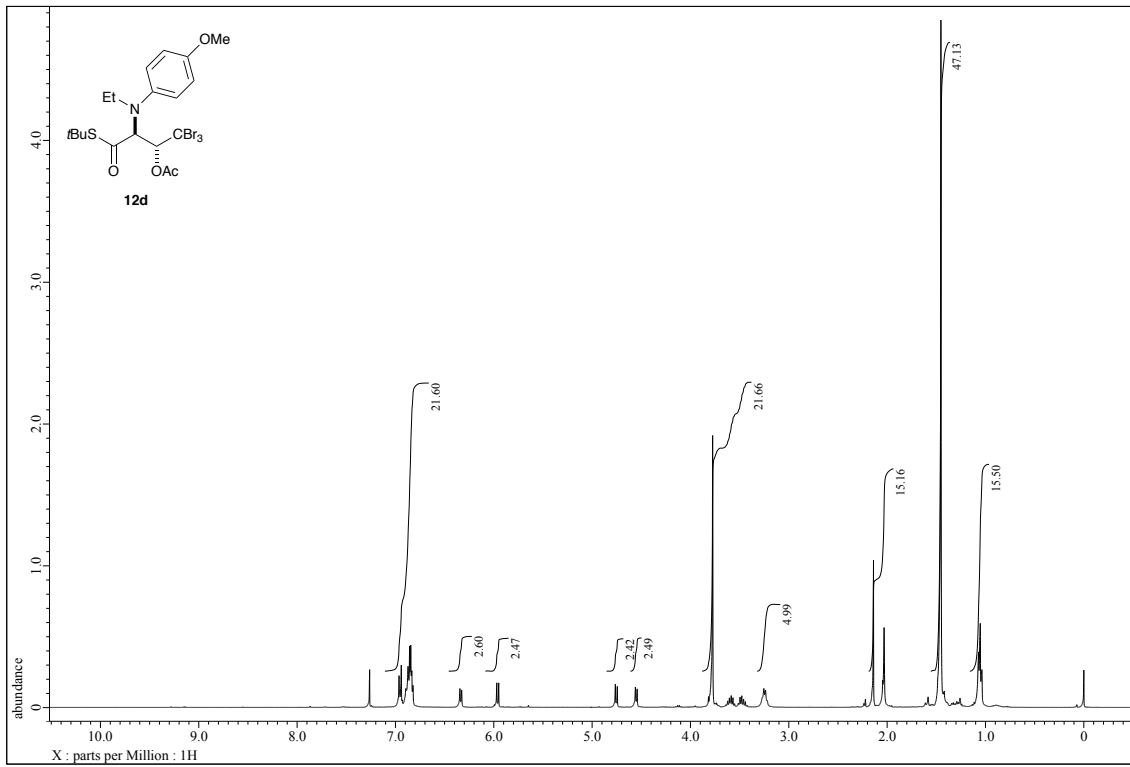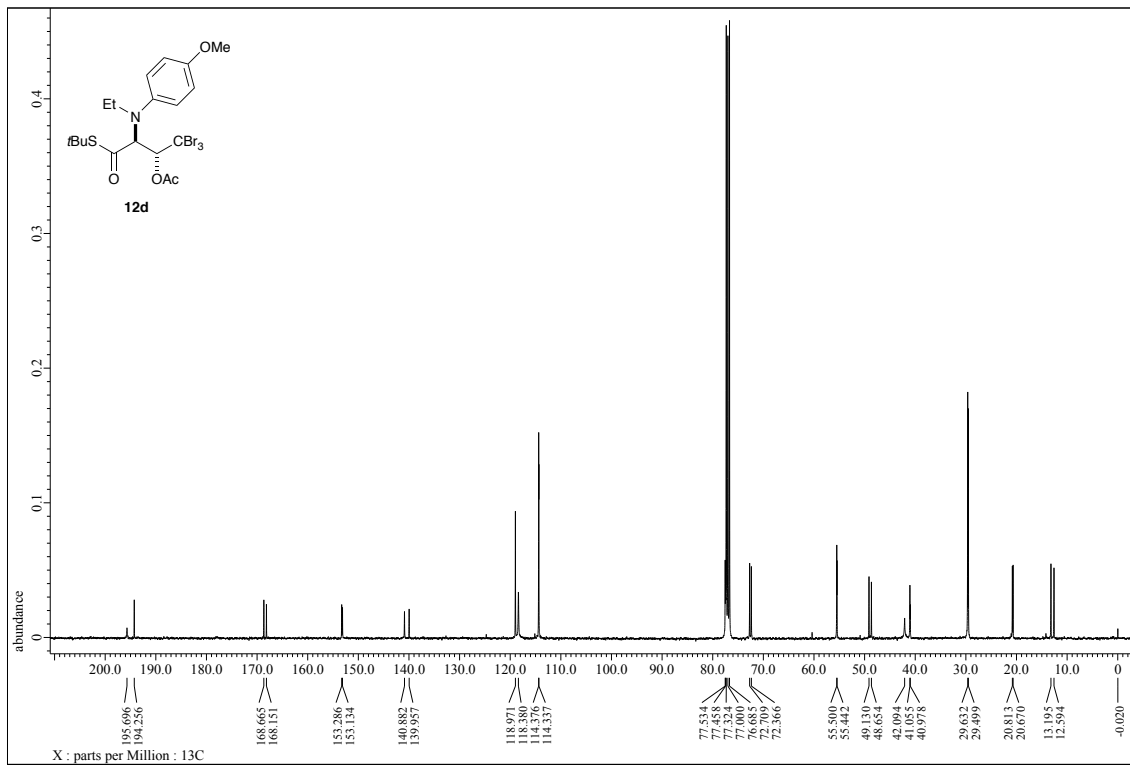

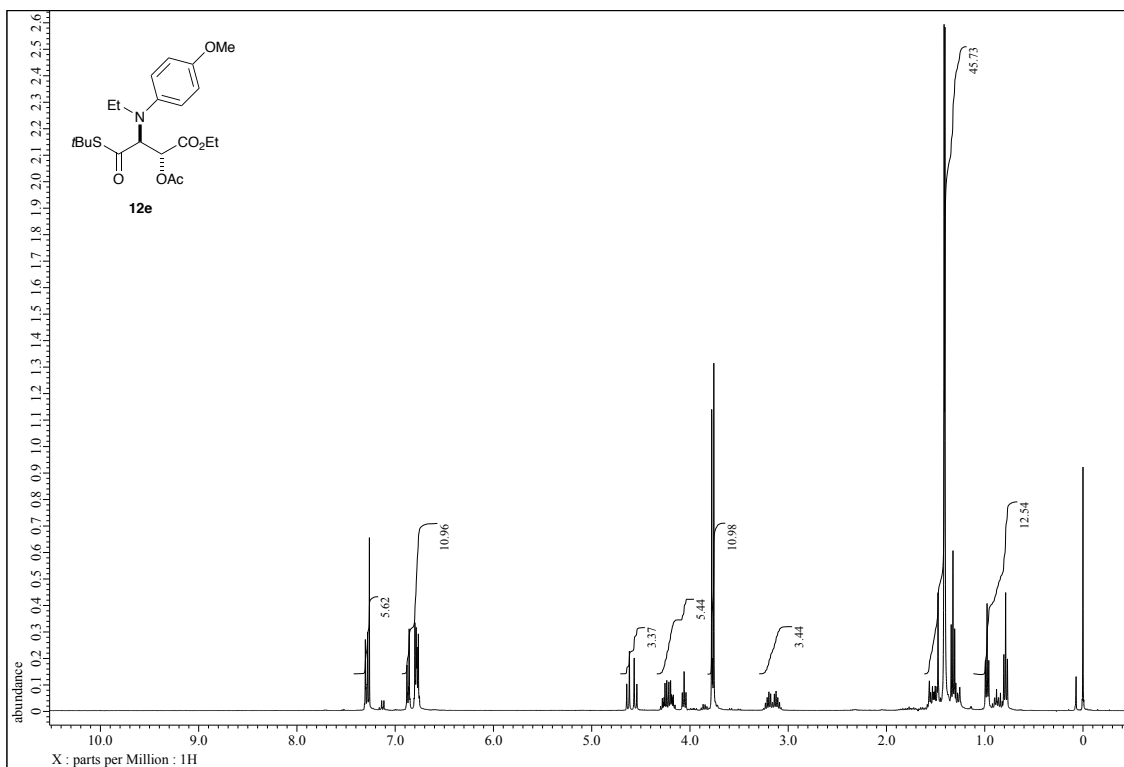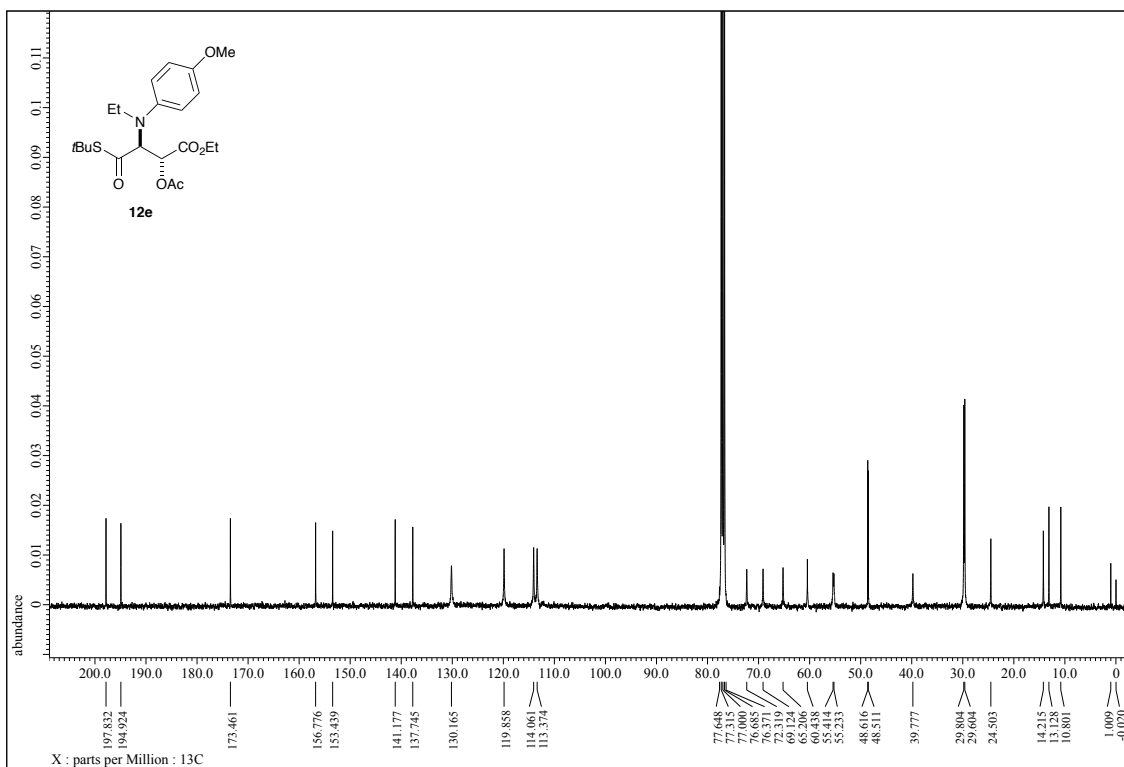



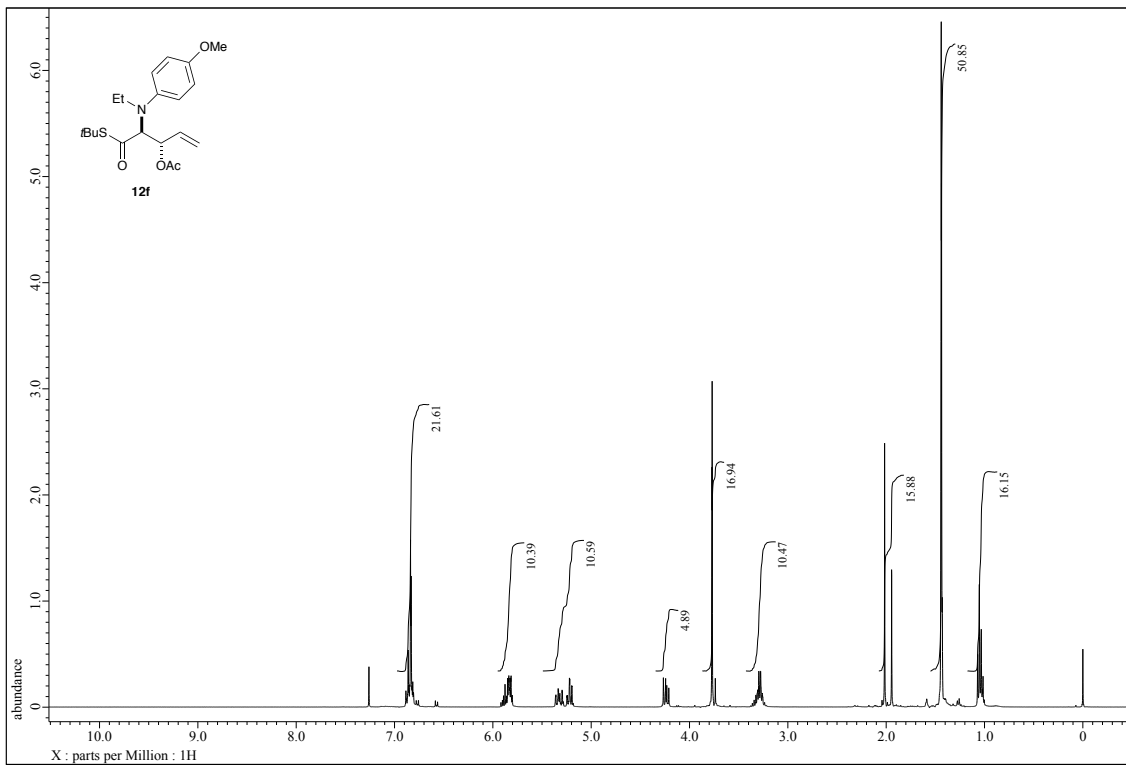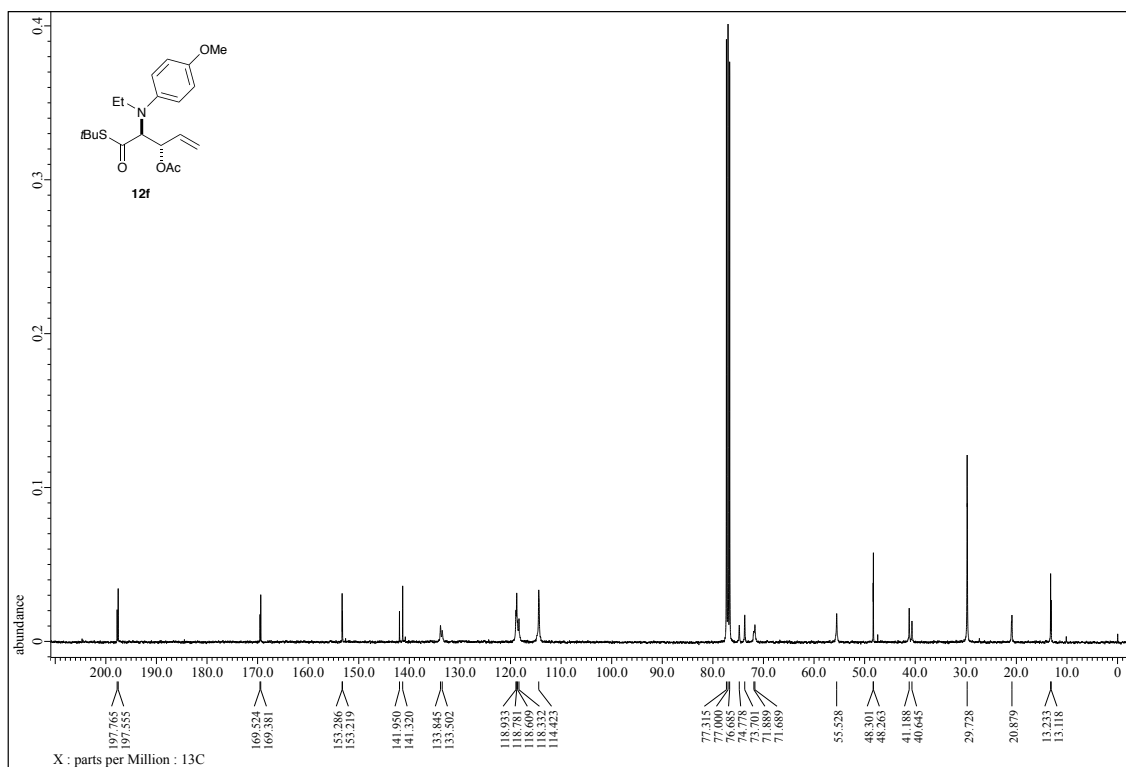

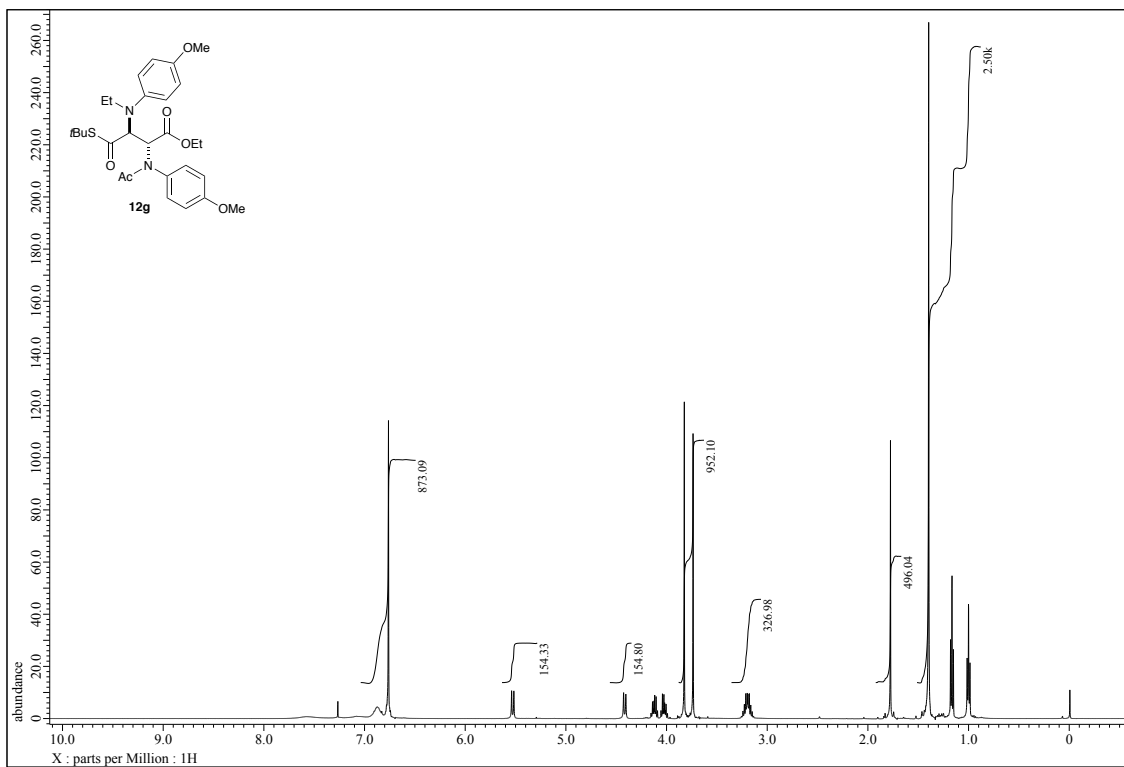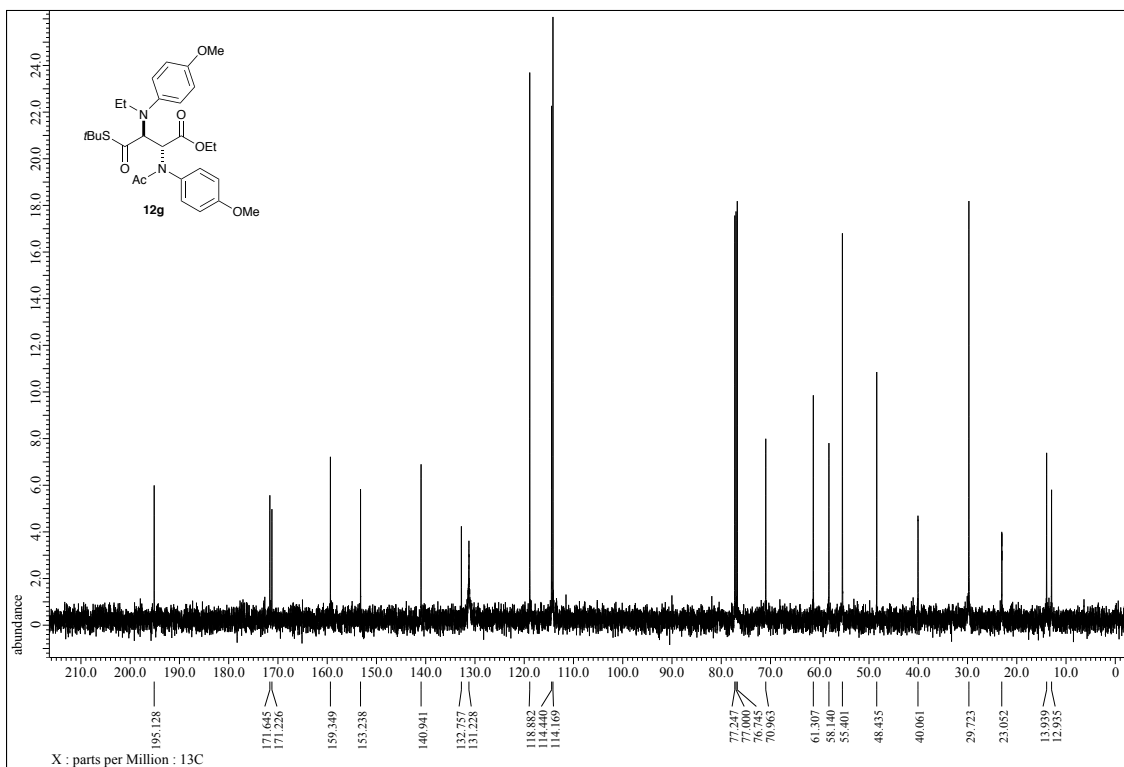

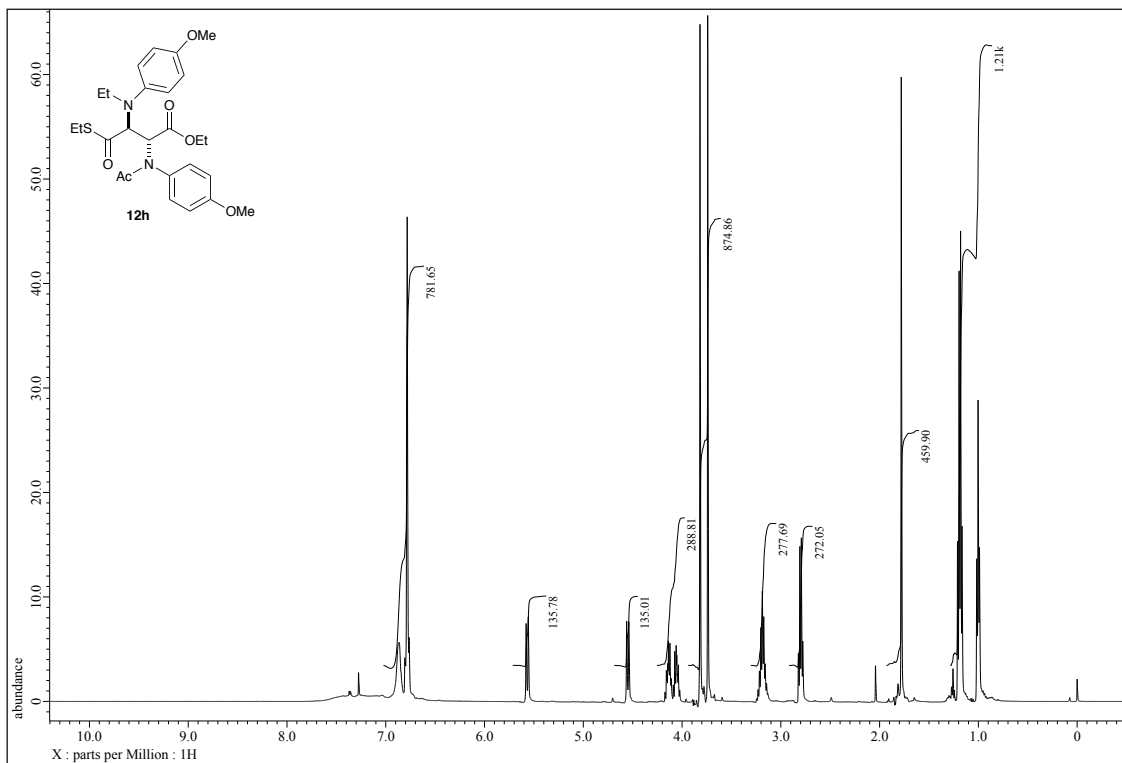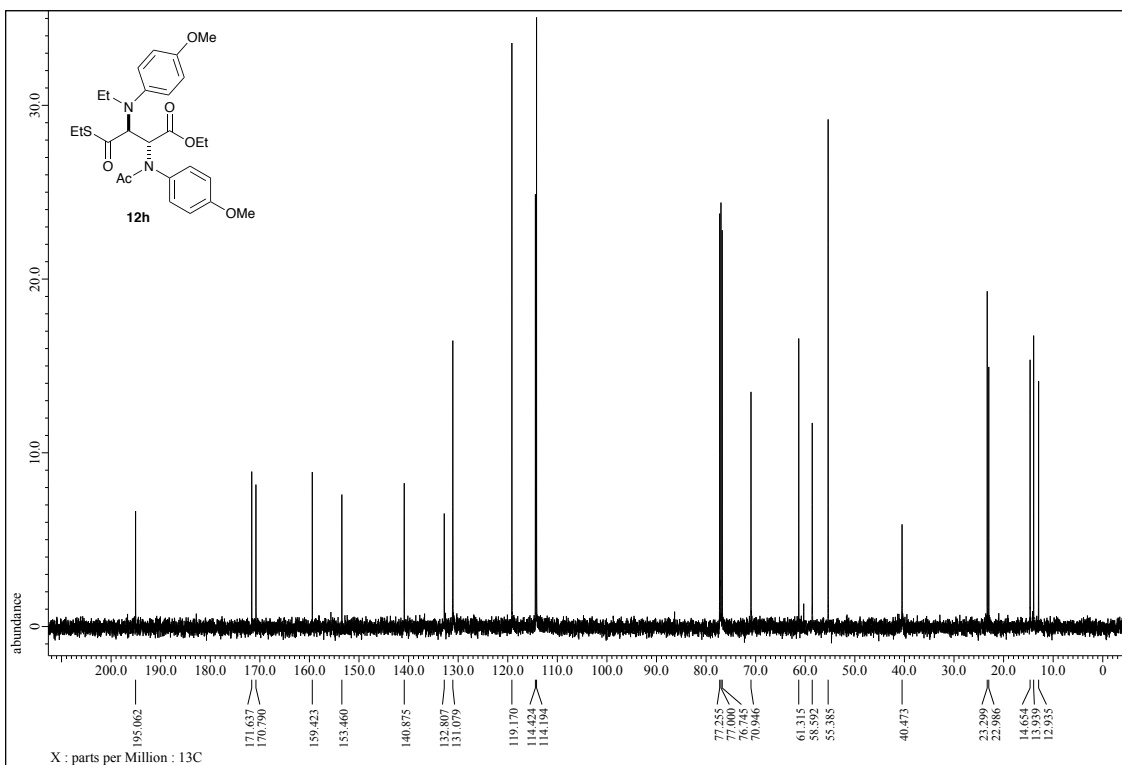

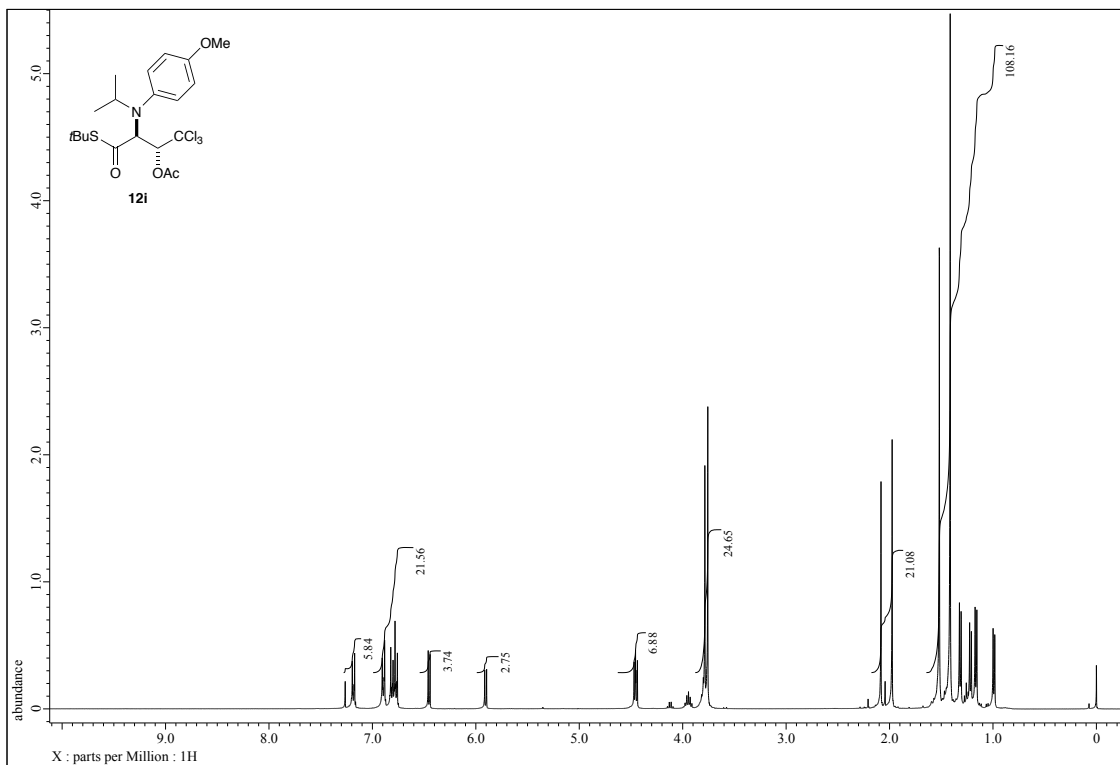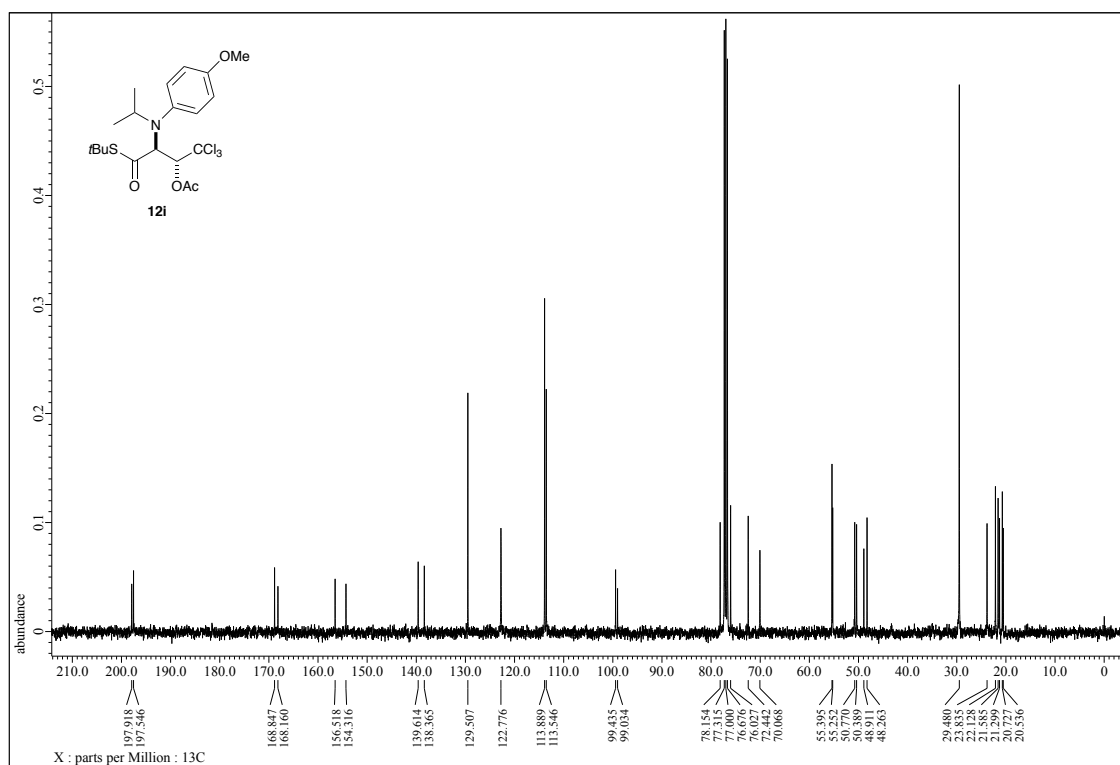

Supplement: RA-011-D1RA02000E-s001.pdf [file RA-011-D1RA02000E-s001.pdf]
